# Supplementary material for: Calcium Dynamics of Ex Vivo Long-Term Cultured CD8+ T Cells Are Regulated by Changes in Redox Metabolism
Source: PubMed Central journal article supplement (PMC4985122; doi:10.1371/journal.pone.0159248), 2016-08-15

## Supplemental Information

**S1 Table. List of all oxidative stress and antioxidant PCR primer targets on the PCR array.**  
Red genes represent targets that are not expressed in CD8+ T cells.

|                |                                                 |               |                                                                |               |                                                                              |               |                                                                                       |
|----------------|-------------------------------------------------|---------------|----------------------------------------------------------------|---------------|------------------------------------------------------------------------------|---------------|---------------------------------------------------------------------------------------|
| <b>ALB</b>     | Albumin                                         | <b>GLRX2</b>  | Glutaredoxin 2                                                 | <b>MTL5</b>   | Metallothionein-like 5, testis-specific (tesmin)                             | <b>PTGS1</b>  | Prostaglandin-endoperoxide synthase 1 (prostaglandin G/H synthase and cyclooxygenase) |
| <b>ALOX12</b>  | Arachidonate 12-lipoxygenase                    | <b>GPR156</b> | G protein-coupled receptor 156                                 | <b>NCF1</b>   | Neutrophil cytosolic factor 1                                                | <b>PTGS2</b>  | Prostaglandin-endoperoxide synthase 2 (prostaglandin G/H synthase and cyclooxygenase) |
| <b>ANGPTL7</b> | Angiotensin-like 7                              | <b>GPX1</b>   | Glutathione peroxidase 1                                       | <b>NCF2</b>   | Neutrophil cytosolic factor 2                                                | <b>PXDN</b>   | Peroxidasin homolog (Drosophila)                                                      |
| <b>AOX1</b>    | Aldehyde oxidase 1                              | <b>GPX2</b>   | Glutathione peroxidase 2 (gastrointestinal)                    | <b>NME5</b>   | Non-metastatic cells 5, protein expressed in (nucleoside-diphosphate kinase) | <b>PXDNL</b>  | Peroxidasin homolog (Drosophila)-like                                                 |
| <b>APOE</b>    | Apolipoprotein E                                | <b>GPX3</b>   | Glutathione peroxidase 3 (plasma)                              | <b>NOS2</b>   | Nitric oxide synthase 2, inducible                                           | <b>RNF7</b>   | Ring finger protein 7                                                                 |
| <b>ATOX1</b>   | ATX1 antioxidant protein 1 homolog (yeast)      | <b>GPX4</b>   | Glutathione peroxidase 4 (phospholipid hydroperoxidase)        | <b>NOX5</b>   | NADPH oxidase, EF-hand calcium binding domain 5                              | <b>SCARA3</b> | Scavenger receptor class A, member 3                                                  |
| <b>BNIP3</b>   | BCL2/adenovirus E1B 19kDa interacting protein 3 | <b>GPX5</b>   | Glutathione peroxidase 5 (epididymal androgen-related protein) | <b>NUDT1</b>  | Nudix (nucleoside diphosphate linked moiety X)-type motif 1                  | <b>SELS</b>   | Selenoprotein S                                                                       |
| <b>CAT</b>     | Catalase                                        | <b>GPX6</b>   | Glutathione peroxidase 6 (olfactory)                           | <b>OXR1</b>   | Oxidation resistance 1                                                       | <b>SEPP1</b>  | Selenoprotein P, plasma, 1                                                            |
| <b>CCL5</b>    | Chemokine (C-C motif) ligand 5                  | <b>GPX7</b>   | Glutathione peroxidase 7                                       | <b>OXSR1</b>  | Oxidative-stress responsive 1                                                | <b>SFTPD</b>  | Surfactant protein D                                                                  |
| <b>CCS</b>     | Copper chaperone for superoxide dismutase       | <b>GSR</b>    | Glutathione reductase                                          | <b>PDLIM1</b> | PDZ and LIM domain 1                                                         | <b>SGK2</b>   | Serum/glucocorticoid regulated kinase 2                                               |
| <b>CSDE1</b>   | Cold shock domain containing E1, RNA-binding    | <b>GSS</b>    | Glutathione synthetase                                         | <b>IPCEF1</b> | Interaction protein for cytohesin exchange factors 1                         | <b>SIRT2</b>  | Sirtuin 2                                                                             |
| <b>CYBA</b>    | Cytochrome b-245, alpha                         | <b>GSTZ1</b>  | Glutathione transferase zeta 1                                 | <b>PNKP</b>   | Polynucleotide kinase 3'-phosphatase                                         | <b>SOD1</b>   | Superoxide dismutase 1, soluble                                                       |

|               |                                  |              |                                               |              |                                                                           |               |                                               |
|---------------|----------------------------------|--------------|-----------------------------------------------|--------------|---------------------------------------------------------------------------|---------------|-----------------------------------------------|
|               | polypeptide                      |              |                                               |              |                                                                           |               |                                               |
| <b>CYGB</b>   | Cytoglobin                       | <b>GTF2I</b> | General transcription factor III              | <b>PRDX1</b> | Peroxiredoxin 1                                                           | <b>SOD2</b>   | Superoxide dismutase 2, mitochondrial         |
| <b>DGKK</b>   | Diacylglycerol kinase, kappa     | <b>KRT1</b>  | Keratin 1                                     | <b>PRDX2</b> | Peroxiredoxin 2                                                           | <b>SOD3</b>   | Superoxide dismutase 3, extracellular         |
| <b>DHCR24</b> | 24-dehydrocholesterol reductase  | <b>LPO</b>   | Lactoperoxidase                               | <b>PRDX3</b> | Peroxiredoxin 3                                                           | <b>SRXN1</b>  | Sulfiredoxin 1                                |
| <b>DUOX1</b>  | Dual oxidase 1                   | <b>MBL2</b>  | Mannose-binding lectin (protein C) 2, soluble | <b>PRDX4</b> | Peroxiredoxin 4                                                           | <b>STK25</b>  | Serine/threonine kinase 25                    |
| <b>DUOX2</b>  | Dual oxidase 2                   | <b>MGST3</b> | Microsomal glutathione S-transferase 3        | <b>PRDX5</b> | Peroxiredoxin 5                                                           | <b>TPO</b>    | Thyroid peroxidase                            |
| <b>DUSP1</b>  | Dual specificity phosphatase 1   | <b>MPO</b>   | Myeloperoxidase                               | <b>PRDX6</b> | Peroxiredoxin 6                                                           | <b>TTN</b>    | Titin                                         |
| <b>EPHX2</b>  | Epoxide hydrolase 2, cytoplasmic | <b>MPV17</b> | MpV17 mitochondrial inner membrane protein    | <b>PREX1</b> | Phosphatidylinositol -3,4,5-trisphosphate-dependent Rac exchange factor 1 | <b>TXNDC2</b> | Thioredoxin domain containing 2 (spermatozoa) |
| <b>EPX</b>    | Eosinophil peroxidase            | <b>MSRA</b>  | Methionine sulfoxide reductase A              | <b>PRG3</b>  | Proteoglycan 3                                                            | <b>TXNRD1</b> | Thioredoxin reductase 1                       |
| <b>FOXM1</b>  | Forkhead box M1                  | <b>MT3</b>   | Metallothionein 3                             | <b>PRNP</b>  | Prion protein                                                             | <b>TXNRD2</b> | Thioredoxin reductase 2                       |

**S2 Table. Exhaustive list of fold changes and their corresponding p-values in targets expressed in CD8+ T cells. A fold change below 1 corresponds to a downregulation ( $2^{-\Delta\text{CT}}$ ).**

| Symbol         | Protein Name                                                             | Fold Change Old/Young | p-value |
|----------------|--------------------------------------------------------------------------|-----------------------|---------|
| <b>PDLIM1</b>  | PDZ and LIM domain 1                                                     | 0.17                  | 0.01    |
| <b>ANGPTL7</b> | Angiopoietin-like 7                                                      | 2.93                  | 0.01    |
| <b>MTL5</b>    | Metallothionein-like 5, testis-specific (tesmin)                         | 0.45                  | 0.01    |
| <b>NUDT1</b>   | Nudix (nucleoside diphosphate linked moiety X)-type motif 1              | 0.99                  | 0.01    |
| <b>TTN</b>     | Titin                                                                    | 2.14                  | 0.01    |
| <b>DUOX1</b>   | Dual oxidase 1                                                           | 1.68                  | 0.03    |
| <b>GPX3</b>    | Glutathione peroxidase 3 (plasma)                                        | 2.55                  | 0.04    |
| <b>GLRX2</b>   | Glutaredoxin 2                                                           | 0.47                  | 0.06    |
| <b>PRNP</b>    | Prion protein                                                            | 1.45                  | 0.07    |
| <b>TXNRD1</b>  | Thioredoxin reductase 1                                                  | 0.31                  | 0.08    |
| <b>PRDX1</b>   | Peroxiredoxin 1                                                          | 0.74                  | 0.13    |
| <b>CCL5</b>    | Chemokine (C-C motif) ligand 5                                           | 3.81                  | 0.15    |
| <b>TXNRD2</b>  | Thioredoxin reductase 2                                                  | 1.15                  | 0.18    |
| <b>GPX2</b>    | Glutathione peroxidase 2 (gastrointestinal)                              | 2.15                  | 0.20    |
| <b>SEPP1</b>   | Selenoprotein P, plasma, 1                                               | 0.34                  | 0.21    |
| <b>ATOX1</b>   | ATX1 antioxidant protein 1 homolog (yeast)                               | 0.50                  | 0.22    |
| <b>BNIP3</b>   | BCL2/adenovirus E1B 19kDa interacting protein 3                          | 1.12                  | 0.23    |
| <b>CCS</b>     | Copper chaperone for superoxide dismutase                                | 0.22                  | 0.23    |
| <b>PX1</b>     | Glutathione peroxidase 1                                                 | 0.18                  | 0.23    |
| <b>PREX1</b>   | Phosphatidylinositol-3,4,5-trisphosphate-dependent Rac exchange factor 1 | 0.90                  | 0.24    |
| <b>PRDX5</b>   | Peroxiredoxin 5                                                          | 0.80                  | 0.29    |
| <b>CSDE1</b>   | Cold shock domain containing E1, RNA-binding                             | 0.49                  | 0.30    |
| <b>SIRT2</b>   | Sirtuin 2                                                                | 1.25                  | 0.32    |
| <b>FOXM1</b>   | Forkhead box M1                                                          | 1.78                  | 0.33    |
| <b>GTF2I</b>   | General transcription factor Iii                                         | 0.52                  | 0.34    |
| <b>GSS</b>     | Glutathione synthetase                                                   | 0.26                  | 0.37    |
| <b>NCF1</b>    | Neutrophil cytosolic factor 1                                            | 9.32                  | 0.42    |
| <b>ALOX12</b>  | Arachidonate 12-lipoxygenase                                             | 0.60                  | 0.46    |
| <b>STK25</b>   | Serine/threonine kinase 25                                               | 4.65                  | 0.46    |
| <b>GPX4</b>    | Glutathione peroxidase 4 (phospholipid hydroperoxidase)                  | 0.02                  | 0.47    |
| <b>SELS</b>    | Selenoprotein S                                                          | 0.10                  | 0.48    |
| <b>MPV17</b>   | MpV17 mitochondrial inner membrane protein                               | 0.57                  | 0.49    |
| <b>MGST3</b>   | Microsomal glutathione S-transferase 3                                   | 0.49                  | 0.50    |
| <b>GSR</b>     | Glutathione reductase                                                    | 0.73                  | 0.51    |
| <b>PRDX2</b>   | Peroxiredoxin 2                                                          | 0.75                  | 0.51    |
| <b>SOD1</b>    | Superoxide dismutase 1, soluble                                          | 6.52                  | 0.51    |
| <b>SRXN1</b>   | Sulfiredoxin 1                                                           | 0.12                  | 0.52    |
| <b>CAT</b>     | Catalase                                                                 | 122.49                | 0.56    |
| <b>MSRA</b>    | Methionine sulfoxide reductase A                                         | 0.79                  | 0.57    |
| <b>MT3</b>     | Metallothionein 3                                                        | 0.28                  | 0.59    |
| <b>NCF2</b>    | Neutrophil cytosolic factor 2                                            | 1.49                  | 0.59    |

|               |                                                      |      |      |
|---------------|------------------------------------------------------|------|------|
| <b>OXR1</b>   | Oxidation resistance 1                               | 0.02 | 0.59 |
| <b>GPX7</b>   | Glutathione peroxidase 7                             | 0.17 | 0.60 |
| <b>EPX</b>    | Eosinophil peroxidase                                | 0.83 | 0.64 |
| <b>CYBA</b>   | P22-phox                                             | 0.41 | 0.65 |
| <b>GSTZ1</b>  | Glutathione transferase zeta 1                       | 1.89 | 0.65 |
| <b>PRDX6</b>  | Peroxiredoxin 6                                      | 3.93 | 0.65 |
| <b>IPCEF1</b> | Interaction protein for cytohesin exchange factors 1 | 0.65 | 0.66 |
| <b>PRDX4</b>  | Peroxiredoxin 4                                      | 2.87 | 0.70 |
| <b>SOD2</b>   | Superoxide dismutase 2, mitochondrial                | 0.33 | 0.70 |
| <b>DUSP1</b>  | Dual specificity phosphatase 1                       | 4.56 | 0.71 |
| <b>RNF7</b>   | Ring finger protein 7                                | 6.55 | 0.71 |
| <b>SFTPD</b>  | Surfactant protein D                                 | 3.35 | 0.72 |
| <b>DHCR24</b> | 24-dehydrocholesterol reductase                      | 0.57 | 0.82 |
| <b>PRDX3</b>  | Peroxiredoxin 3                                      | 1.60 | 0.84 |
| <b>OXSR1</b>  | Oxidation resistance 1                               | 2.20 | 0.95 |
| <b>PNKP</b>   | Polynucleotide kinase 3'-phosphatase                 | 1.59 | 0.98 |

**S3 Table S3. Normalized mRNA levels of individual genes expressed in young CD8+ T cells, ranked in descending order of expression (n=6).**

| <b>Symbol</b> | <b>Protein Name</b>                                                      | <b>Mean <math>\Delta</math>Ct <math>\pm</math> SEM</b> | <b>% CV</b> |
|---------------|--------------------------------------------------------------------------|--------------------------------------------------------|-------------|
| <b>CYBA</b>   | P22-phox                                                                 | 3.77 $\pm$ 0.4                                         | 10.64       |
| <b>CCL5</b>   | Chemokine (C-C motif) ligand 5                                           | 3.58 $\pm$ 0.68                                        | 19.06       |
| <b>SOD1</b>   | Superoxide dismutase 1, soluble                                          | 4.19 $\pm$ 0.23                                        | 5.56        |
| <b>GPX4</b>   | Glutathione peroxidase 4<br>(phospholipid hydroperoxidase)               | 4.38 $\pm$ 0.40                                        | 9.24        |
| <b>PRDX6</b>  | Peroxiredoxin 6                                                          | 4.60 $\pm$ 0.30                                        | 6.48        |
| <b>GTF2I</b>  | General transcription factor Iii                                         | 4.79 $\pm$ 0.28                                        | 5.93        |
| <b>PRDX3</b>  | Peroxiredoxin 3                                                          | 4.61 $\pm$ 0.46                                        | 9.98        |
| <b>PRDX2</b>  | Peroxiredoxin 2                                                          | 4.78 $\pm$ 0.35                                        | 7.24        |
| <b>GPX1</b>   | Glutathione peroxidase 1                                                 | 5.17 $\pm$ 0.23                                        | 4.48        |
| <b>CSDE1</b>  | Cold shock domain containing E1, RNA-binding                             | 5.19 $\pm$ 0.23                                        | 4.48        |
| <b>FOXM1</b>  | Forkhead box M1                                                          | 5.39 $\pm$ 0.18                                        | 3.44        |
| <b>PRDX5</b>  | Peroxiredoxin 5                                                          | 5.38 $\pm$ 0.28                                        | 5.25        |
| <b>ATOX1</b>  | ATX1 antioxidant protein 1 homolog (yeast)                               | 5.60 $\pm$ 0.21                                        | 3.70        |
| <b>TXNRD1</b> | Thioredoxin reductase 1                                                  | 6.17 $\pm$ 0.08                                        | 1.33        |
| <b>DHCR24</b> | 24-dehydrocholesterol reductase                                          | 6.38 $\pm$ 0.18                                        | 2.83        |
| <b>RNF7</b>   | Ring finger protein 7                                                    | 6.58 $\pm$ 0.21                                        | 3.13        |
| <b>SOD2</b>   | Superoxide dismutase 2, mitochondrial                                    | 6.59 $\pm$ 0.21                                        | 3.12        |
| <b>OXSRI</b>  | Oxidative-stress responsive 1                                            | 6.98 $\pm$ 0.10                                        | 1.47        |
| <b>CAT</b>    | Catalase                                                                 | 6.78 $\pm$ 0.4                                         | 5.92        |
| <b>PRDX4</b>  | Peroxiredoxin 4                                                          | 6.99 $\pm$ 0.36                                        | 5.18        |
| <b>MGST3</b>  | Microsomal glutathione S-transferase 3                                   | 7.18 $\pm$ 0.23                                        | 3.22        |
| <b>MPV17</b>  | MpV17 mitochondrial inner membrane protein                               | 7.18 $\pm$ 0.23                                        | 3.21        |
| <b>GLRX2</b>  | Glutaredoxin 2                                                           | 7.39 $\pm$ 0.18                                        | 2.49        |
| <b>GSS</b>    | Glutathione synthetase                                                   | 7.37 $\pm$ 0.28                                        | 3.81        |
| <b>BNIP3</b>  | BCL2/adenovirus E1B 19kDa interacting protein 3                          | 7.38 $\pm$ 0.34                                        | 4.62        |
| <b>SELS</b>   | Selenoprotein S                                                          | 7.78 $\pm$ 0.28                                        | 3.62        |
| <b>STK25</b>  | Serine/threonine kinase 25                                               | 7.98 $\pm$ 0.10                                        | 1.24        |
| <b>TXNRD2</b> | Thioredoxin reductase 2                                                  | 7.79 $\pm$ 0.34                                        | 4.43        |
| <b>NUDT1</b>  | Nudix (nucleoside diphosphate linked moiety X)-type motif 1              | 8.18 $\pm$ 0.09                                        | 1.04        |
| <b>PNKP</b>   | Polynucleotide kinase 3'-phosphatase                                     | 7.99 $\pm$ 0.31                                        | 3.89        |
| <b>GPX7</b>   | Glutathione peroxidase 7                                                 | 8.00 $\pm$ 0.31                                        | 3.89        |
| <b>OXR1</b>   | Oxidation resistance 1                                                   | 8.19 $\pm$ 0.23                                        | 2.85        |
| <b>PRDX1</b>  | Peroxiredoxin 1                                                          | 8.19 $\pm$ 0.30                                        | 3.70        |
| <b>CCS</b>    | Copper chaperone for superoxide dismutase                                | 8.80 $\pm$ 0.19                                        | 2.13        |
| <b>IPCEF1</b> | Interaction protein for cytohesin exchange factors 1                     | 8.57 $\pm$ 0.58                                        | 6.78        |
| <b>MTL5</b>   | Metallothionein-like 5, testis-specific (tesmin)                         | 8.97 $\pm$ 0.31                                        | 3.46        |
| <b>SIRT2</b>  | Sirtuin 2                                                                | 9.01 $\pm$ 0.38                                        | 4.20        |
| <b>PREX1</b>  | Phosphatidylinositol-3,4,5-trisphosphate-dependent Rac exchange factor 1 | 9.18 $\pm$ 0.23                                        | 2.49        |
| <b>GSTZ1</b>  | Glutathione transferase zeta 1                                           | 9.19 $\pm$ 0.37                                        | 4.07        |
| <b>NCF2</b>   | Neutrophil cytosolic factor 2                                            | 9.38 $\pm$ 0.39                                        | 4.20        |
| <b>NCF1</b>   | Neutrophil cytosolic factor 1                                            | 9.00 $\pm$ 0.89                                        | 9.91        |

|                |                                             |              |      |
|----------------|---------------------------------------------|--------------|------|
| <b>SRXN1</b>   | Sulfiredoxin 1                              | 10.18 ± 0.23 | 2.26 |
| <b>MSRA</b>    | Methionine sulfoxide reductase A            | 10.18 ± 0.3  | 2.93 |
| <b>DUSP1</b>   | Dual specificity phosphatase 1              | 10.19 ± 0.43 | 4.19 |
| <b>GPX3</b>    | Glutathione peroxidase 3 (plasma)           | 10.37 ± 0.49 | 4.76 |
| <b>SEPP1</b>   | Selenoprotein P, plasma, 1                  | 10.57 ± 0.29 | 2.80 |
| <b>PRNP</b>    | Prion protein                               | 11.01 ± 0.10 | 0.90 |
| <b>GSR</b>     | Glutathione reductase                       | 10.78 ± 0.34 | 3.17 |
| <b>PDLIM1</b>  | PDZ and LIM domain 1                        | 10.98 ± 0.3  | 2.79 |
| <b>TTN</b>     | Titin                                       | 11.19 ± 0.42 | 3.79 |
| <b>MT3</b>     | Metallothionein 3                           | 11.4 ± 0.73  | 6.40 |
| <b>ANGPTL7</b> | Angiopoietin-like 7                         | 12.17 ± 0.23 | 1.87 |
| <b>ALOX12</b>  | Arachidonate 12-lipoxygenase                | 12.17 ± 0.42 | 3.48 |
| <b>EPX</b>     | Eosinophil peroxidase                       | 12.58 ± 0.41 | 3.29 |
| <b>DUOX1</b>   | Dual oxidase 1                              | 12.78 ± 0.34 | 2.68 |
| <b>SFTPD</b>   | Surfactant protein D                        | 12.57 ± 0.76 | 6.07 |
| <b>PXDN</b>    | Peroxidasin homolog (Drosophila)            | 13.21 ± 0.62 | 4.70 |
| <b>GPX2</b>    | Glutathione peroxidase 2 (gastrointestinal) | 13.99 ± 0.47 | 3.36 |

**S1 Fig. Example flow cytometry median calcium traces from a donor obtained at Day 4 and Day 24.** After cold-binding with anti-CD3 and anti-CD28 as described in Materials and Methods, cells were sampled for 3 minutes by flow cytometry before addition of anti-mouse IgG. The average of the fluorescence ratio was calculated at 4 second intervals and then normalized to the average baseline value to provide a fold-change value.

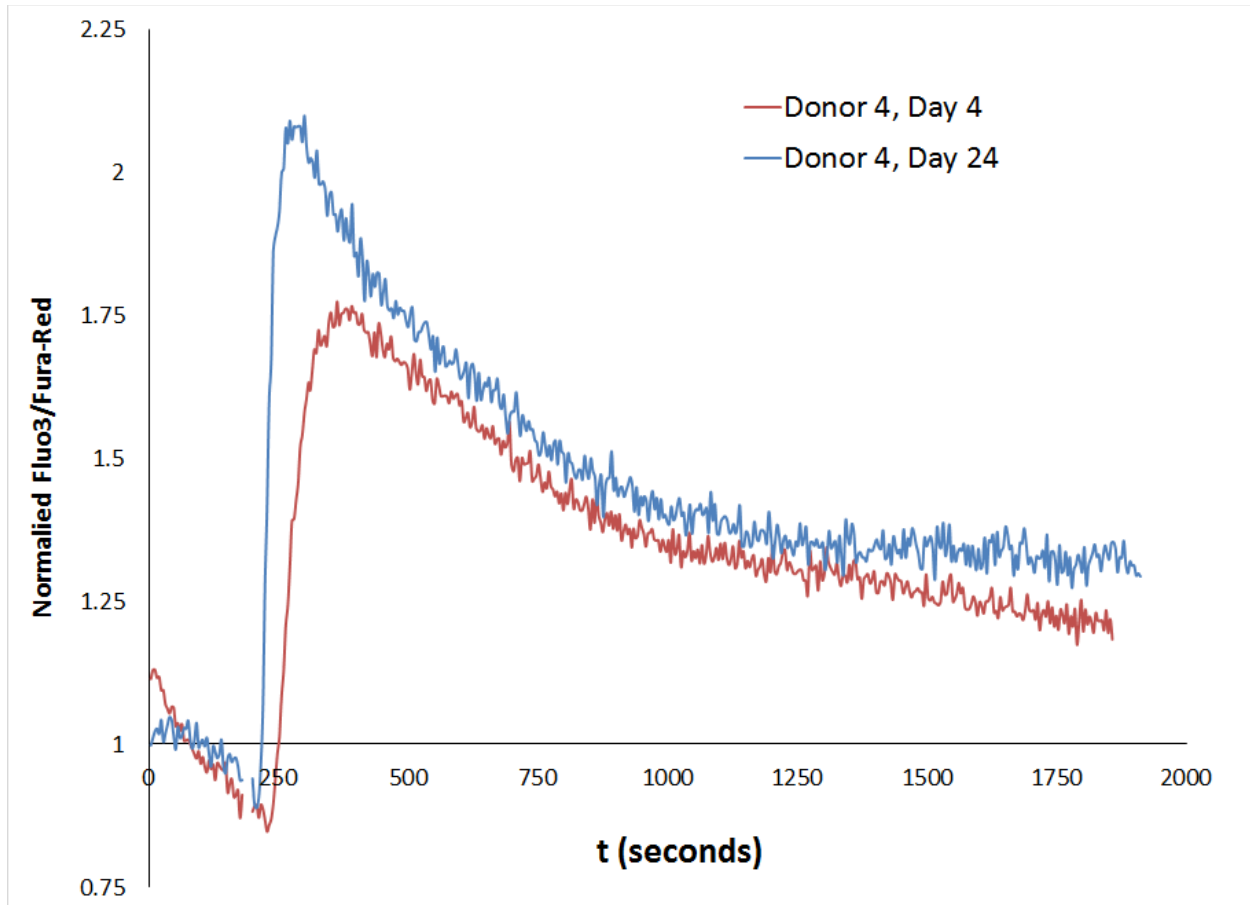

**S2 Fig. Optimization of Jurkat T Cell Model using data obtained by no inhibitor, TMB-8, and EGTA conditions.** Plots represent 17 different optimized parameter sets that were obtained from comparing the model prediction to experimental data.

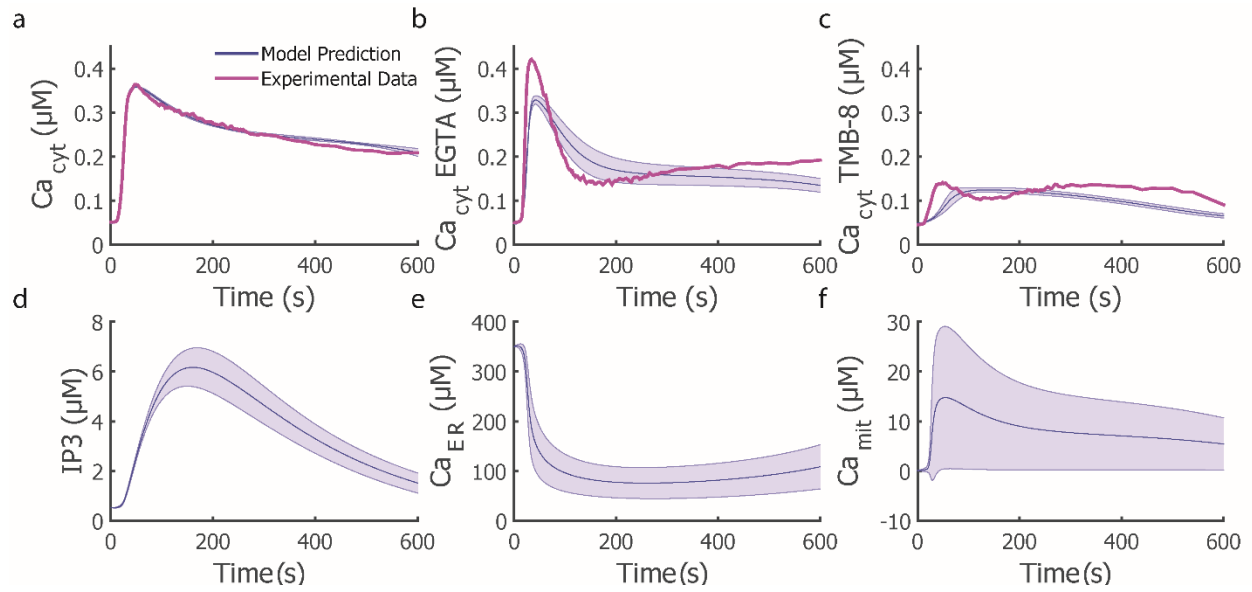



**S3 Fig. Jurkat T Cell model behavior by parameter set used to fit Young CD8+ model**

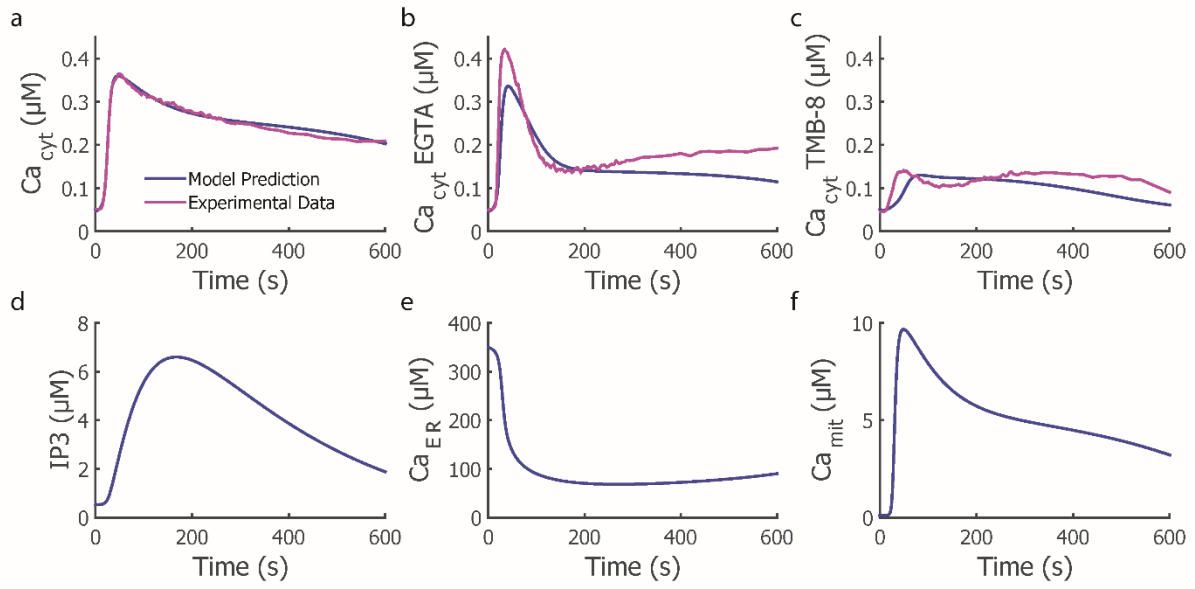

**S4 Table. Optimized parameter set obtained from the Jurkat T Cell Model fitting used for the seeding the initial population of parameter values for the genetic algorithm optimization of the Young CD8<sup>+</sup> T Cell Model to experimental data.**

| <b>Parameter</b> | <b>Jurkat T cells</b>                 |
|------------------|---------------------------------------|
| $\beta_i^*$      | 0.056                                 |
| $\beta_{er}^*$   | 0.049                                 |
| $\beta_{mit}$    | 0.033                                 |
| $\rho_{er}$      | 0.015                                 |
| $\rho_{mit}$     | 0.08                                  |
| $k_{PLCact}$     | 0.0033 s <sup>-1</sup>                |
| $k_{PLCdeact}$   | 0.042 s <sup>-1</sup>                 |
| $k_{IP3prod}$    | 0.48 μM <sup>-1</sup> s <sup>-1</sup> |
| $k_{IP3deg}^*$   | 0.010 s <sup>-1</sup>                 |
| $V_{IP3}$        | 4.0 s <sup>-1</sup>                   |
| $K_{IP3}$        | 0.57 μM                               |
| $K_{act}$        | 0.13 μM                               |
| $A$              | 0.079                                 |
| $K_{inh}$        | 1 μM                                  |
| $K_{IP3inh}^*$   | 0.82 μM                               |
| $K_{ERleak}^*$   | 0.0043 s <sup>-1</sup>                |
| $V_{serca}^*$    | 112.75 μM s <sup>-1</sup>             |
| $K_{serca}$      | 0.43 μM                               |
| $V_{mitin}$      | 388.6 μM s <sup>-1</sup>              |
| $K_{mitin}$      | 0.81 μM                               |
| $V_{mitout}^*$   | 188.9 μM s <sup>-1</sup>              |
| $K_{mitout}^*$   | 4.03 μM                               |
| $V_{crac}$       | 2.4 μM s <sup>-1</sup>                |
| $K_{soc}^*$      | 363.5 μM                              |
| $K_{stim}$       | 178.1 μM                              |

---

|              |                                    |
|--------------|------------------------------------|
| $K_{PMleak}$ | $1.1e-6 \text{ s}^{-1}$            |
| $V_{pmca}^*$ | $2.14 \text{ } \mu\text{M s}^{-1}$ |
| $K_{pmca}$   | $0.11 \text{ } \mu\text{M}$        |

---

**S5 Table. Optimized parameter set obtained from fitting the Young CD8<sup>+</sup> T Cell Model to experimental data.** This parameter set was used for all sensitivity analysis performed on the Young CD8<sup>+</sup> T Cell Model.

| Parameter      | Primary CD8 <sup>+</sup> T cells      |
|----------------|---------------------------------------|
| $\beta_i^*$    | 0.047                                 |
| $\beta_{er}^*$ | 0.98                                  |
| $\beta_{mit}$  | 0.033                                 |
| $\rho_{er}$    | 0.015                                 |
| $\rho_{mit}$   | 0.08                                  |
| $k_{PLCact}$   | 0.0033 s <sup>-1</sup>                |
| $k_{PLCdeact}$ | 0.042 s <sup>-1</sup>                 |
| $k_{IP3prod}$  | 0.48 μM <sup>-1</sup> s <sup>-1</sup> |
| $k_{IP3deg}^*$ | 0.018 μs <sup>-1</sup>                |
| $V_{IP3}$      | 4.0 μs <sup>-1</sup>                  |
| $K_{IP3}$      | 0.57 μM                               |
| $K_{act}$      | 0.13 μM                               |
| $A$            | 0.079                                 |
| $K_{inh}$      | 1 μM                                  |
| $K_{IP3inh}^*$ | 1.5 μM                                |
| $K_{ERleak}^*$ | 0.048 s <sup>-1</sup>                 |
| $V_{serca}^*$  | 103.88 μM s <sup>-1</sup>             |
| $K_{serca}$    | 0.43 μM                               |
| $V_{mitin}$    | 388.6 μM s <sup>-1</sup>              |
| $K_{mitin}$    | 0.81 μM                               |
| $V_{mitout}^*$ | 244.7 μM s <sup>-1</sup>              |
| $K_{mitout}^*$ | 4.7 μM                                |
| $V_{crac}$     | 2.4 μM s <sup>-1</sup>                |

---

|              |                           |
|--------------|---------------------------|
| $K_{soc}^*$  | 358.8 $\mu\text{M}$       |
| $K_{stim}$   | 178.1 $\mu\text{M}$       |
| $K_{PMleak}$ | 1.1e-6 $\text{s}^{-1}$    |
| $V_{pmca}^*$ | 2.08 $\mu\text{M s}^{-1}$ |
| $K_{pmca}$   | 0.11 $\mu\text{M}$        |

---

**S4 Fig. Optimized Young CD8<sup>+</sup> T Cell Model.**

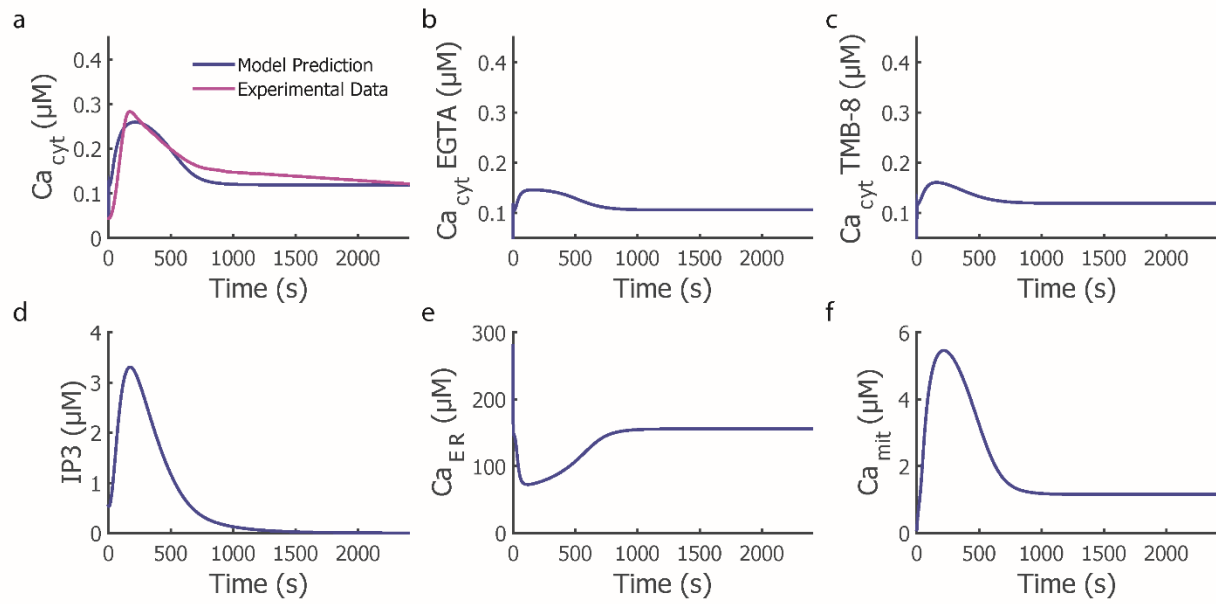

S5 Fig. Best fit of Old CD8<sup>+</sup> T Cell Model varying only two parameters,  $V_{crac}$  and  $V_{pmca}$ .

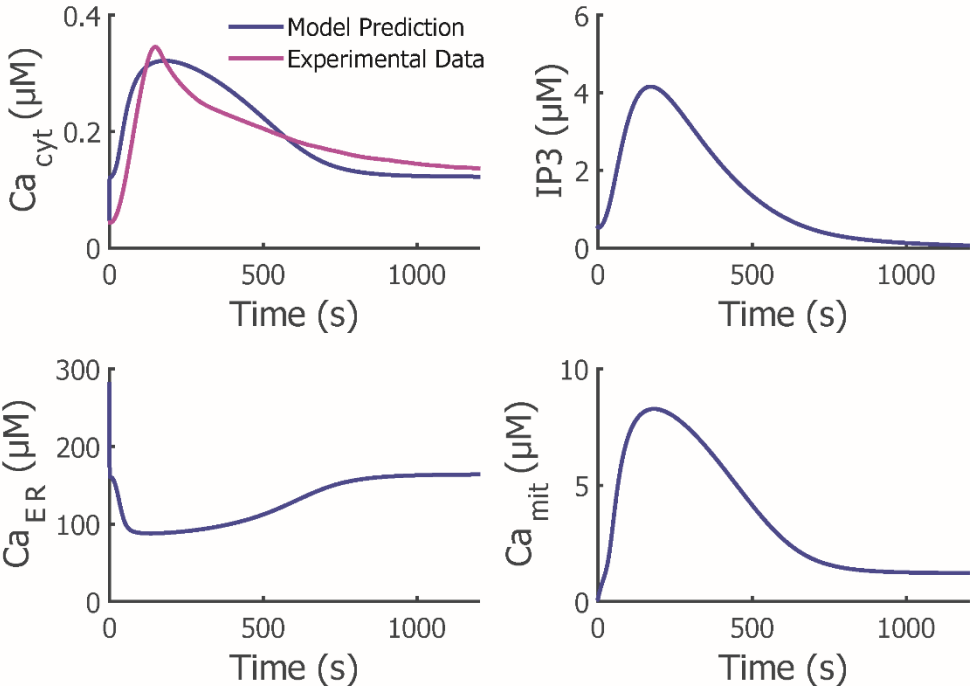

**S6 Fig. Best fit of Old CD8<sup>+</sup> Young T Cell Model varying the seven parameters as identified in the sensitivity analysis of the Young CD8<sup>+</sup> Young T Cell Model.**

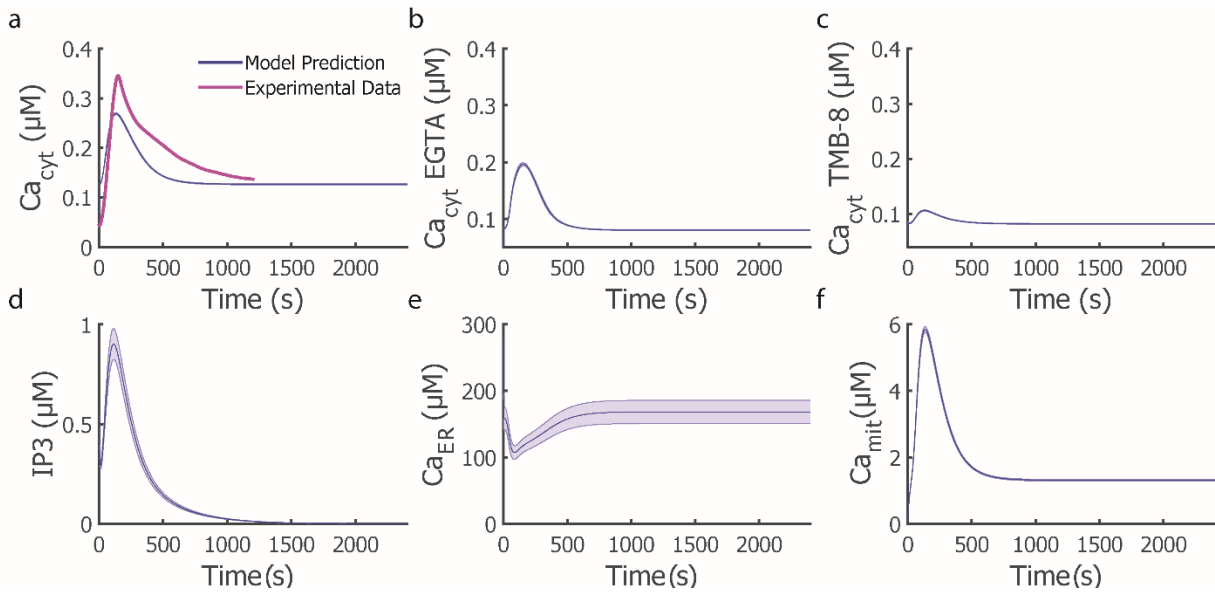



**S7 Fig. Varying  $K_{stim}$  from the Young CD8<sup>+</sup> T Cell Model fit to investigate the effects on calcium traces.  $K_{stim}$  was varied +/- 20% the fit value of 178.**

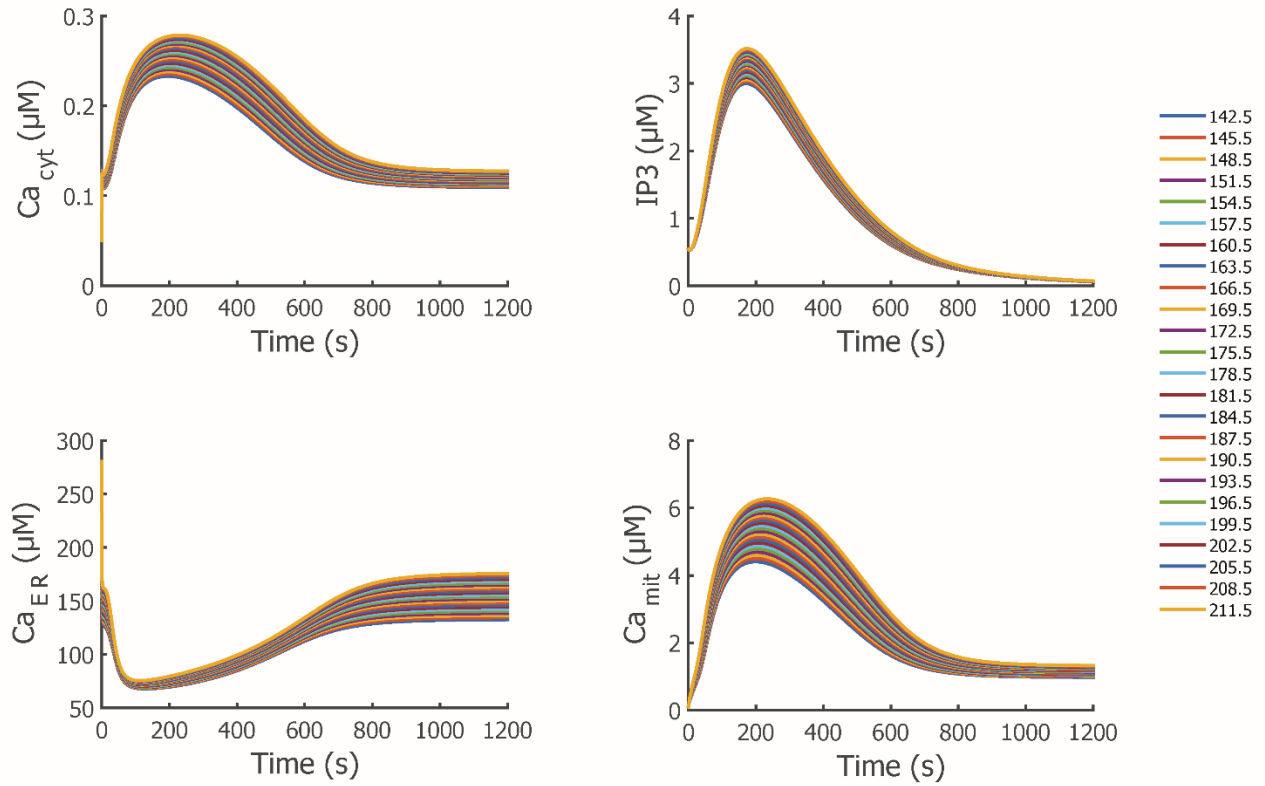

**S8 Fig. Varying  $V_{crac}$  from the Young CD8<sup>+</sup> T Cell Model to investigate the effects on calcium traces.  $V_{crac}$  was varied +/- 20% the fit value of 2.37.**

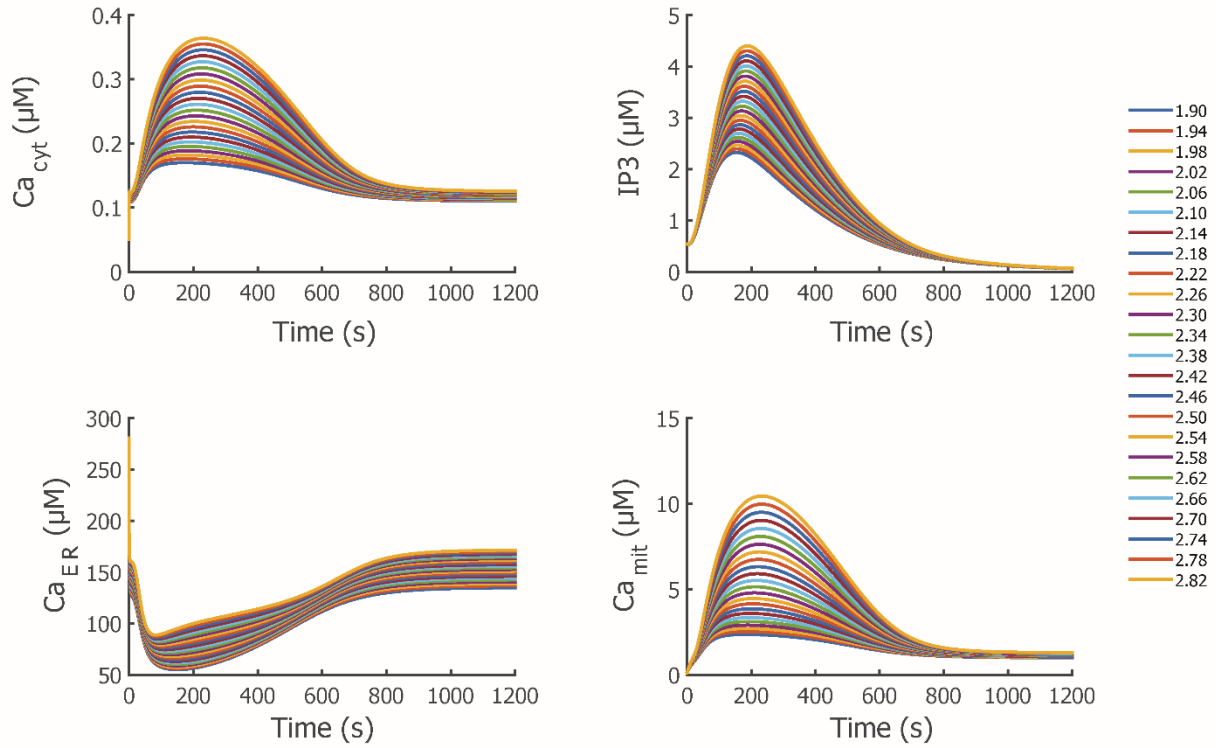

**S9 Fig. Validation of RT-PCR results with Duox 1 expression.** a) Representative Western Blot. b) Quantification of the Western Blots. Protein levels are normalized to the young cells protein expression level. \*  $p < 0.05$  (paired 2-tail t-test).

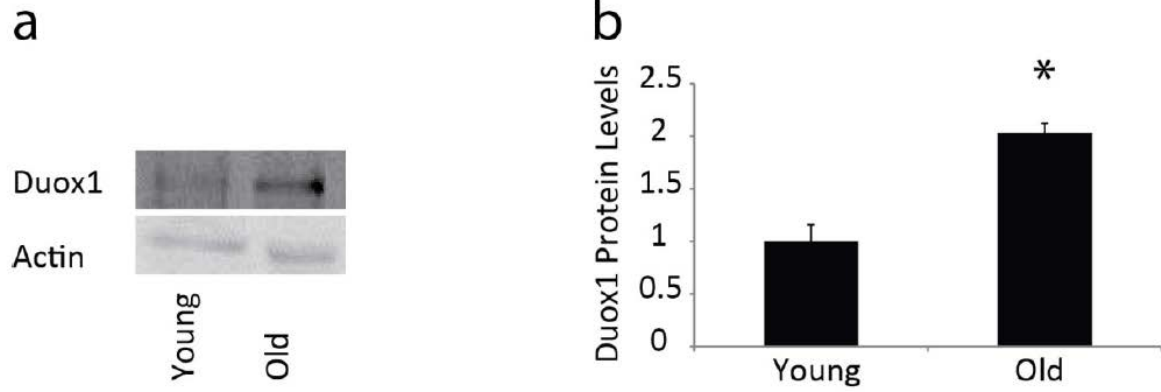

**S10 Fig. Expression of STIM1 in young and old primary human CD8+ T cells.**

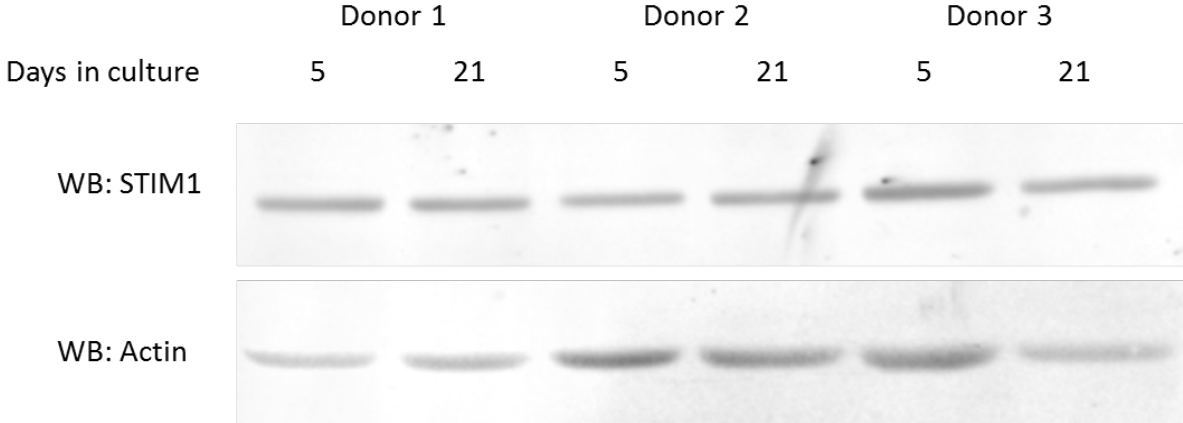

Supplement: pone.0159248.s008.pdf [file pone.0159248.s008.pdf]
