# Supplementary material for: Calcium Dynamics of Ex Vivo Long-Term Cultured CD8+ T Cells Are Regulated by Changes in Redox Metabolism
Source: PubMed Central journal article supplement (PMC4985122; doi:10.1371/journal.pone.0159248), 2016-08-15

**S1 Fig. Example flow cytometry median calcium traces from a donor obtained at Day 4 and Day 24.** After cold-binding with anti-CD3 and anti-CD28 as described in Materials and Methods, cells were sampled for 3 minutes by flow cytometry before addition of anti-mouse IgG. The average of the fluorescence ratio was calculated at 4 second intervals and then normalized to the average baseline value to provide a fold-change value.

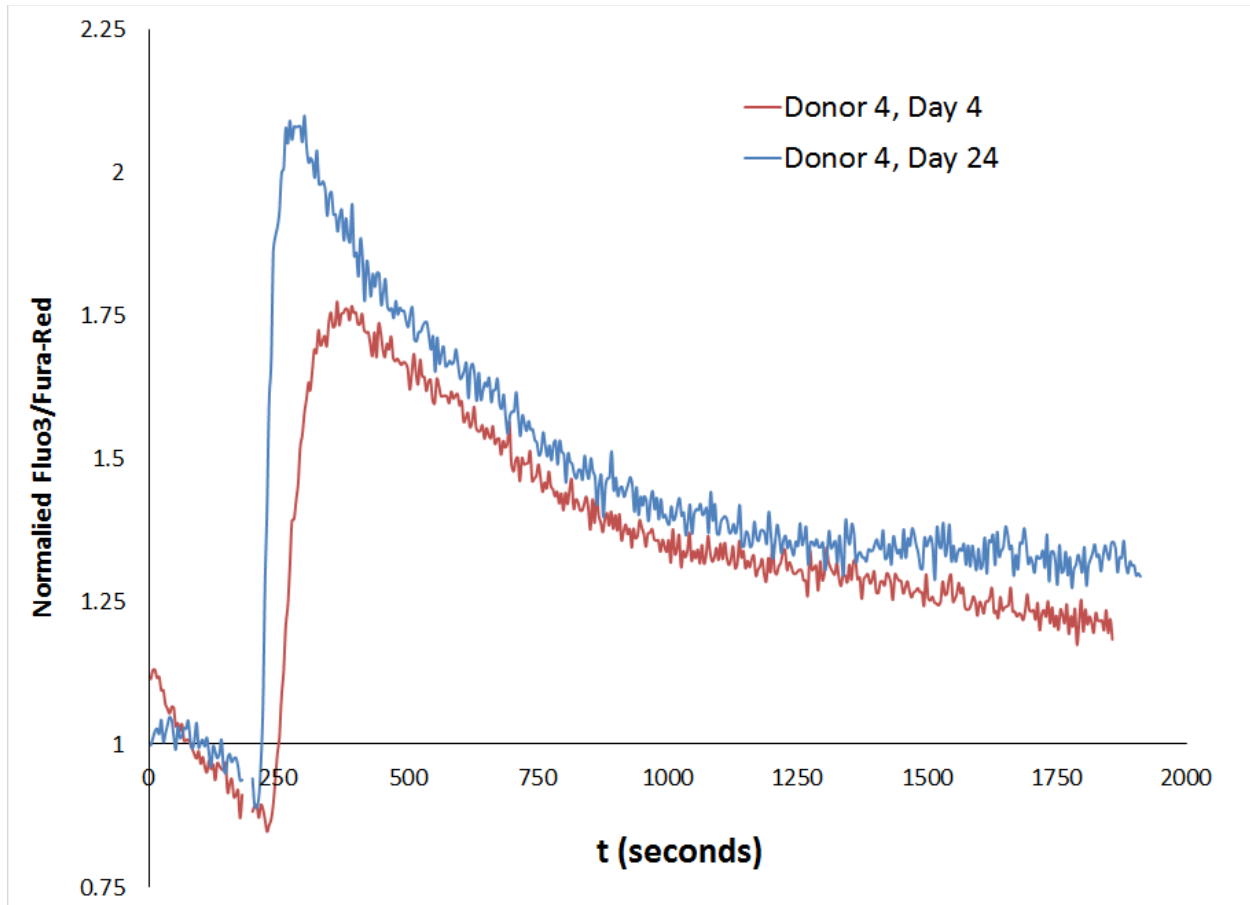

Supplement: pone.0159248.s001.pdf [file pone.0159248.s001.pdf]
