# Supplementary material for: Calcium Dynamics of Ex Vivo Long-Term Cultured CD8+ T Cells Are Regulated by Changes in Redox Metabolism
Source: PubMed Central journal article supplement (PMC4985122; doi:10.1371/journal.pone.0159248), 2016-08-15

**S2 Fig. Optimization of Jurkat T Cell Model using data obtained by no inhibitor, TMB-8, and EGTA conditions.** Plots represent 17 different optimized parameter sets that were obtained from comparing the model prediction to experimental data.

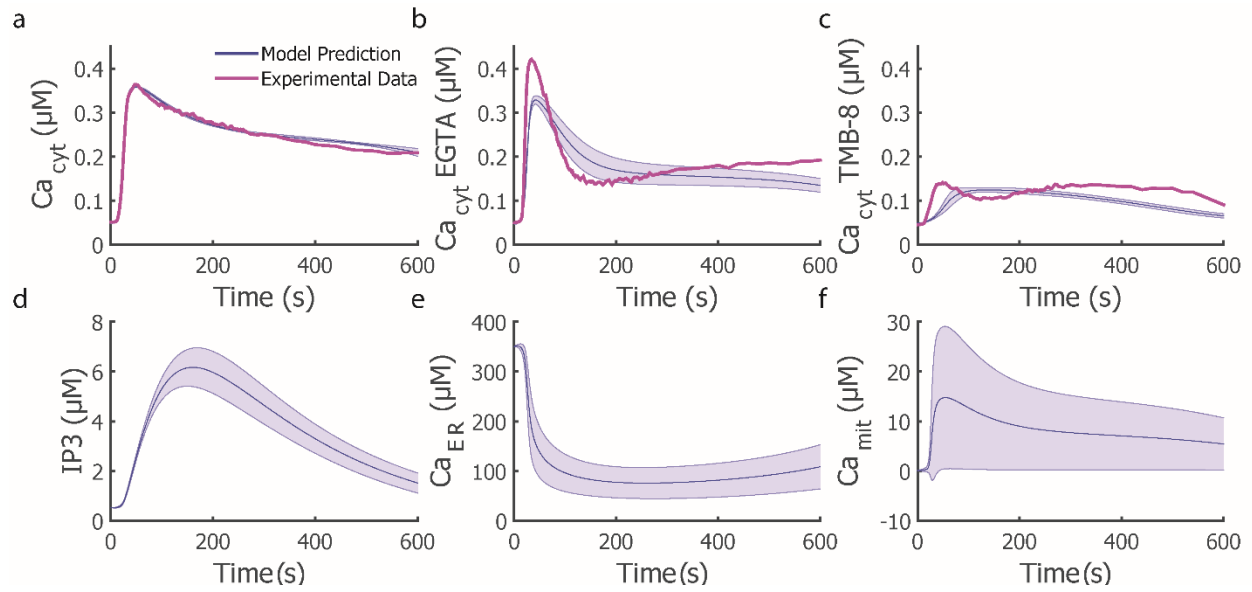

Supplement: pone.0159248.s002.pdf [file pone.0159248.s002.pdf]
