# Supplementary material for: Calcium Dynamics of Ex Vivo Long-Term Cultured CD8+ T Cells Are Regulated by Changes in Redox Metabolism
Source: PubMed Central journal article supplement (PMC4985122; doi:10.1371/journal.pone.0159248), 2016-08-15

**S3 Fig. Jurkat T Cell model behavior by parameter set used to fit Young CD8+ model**

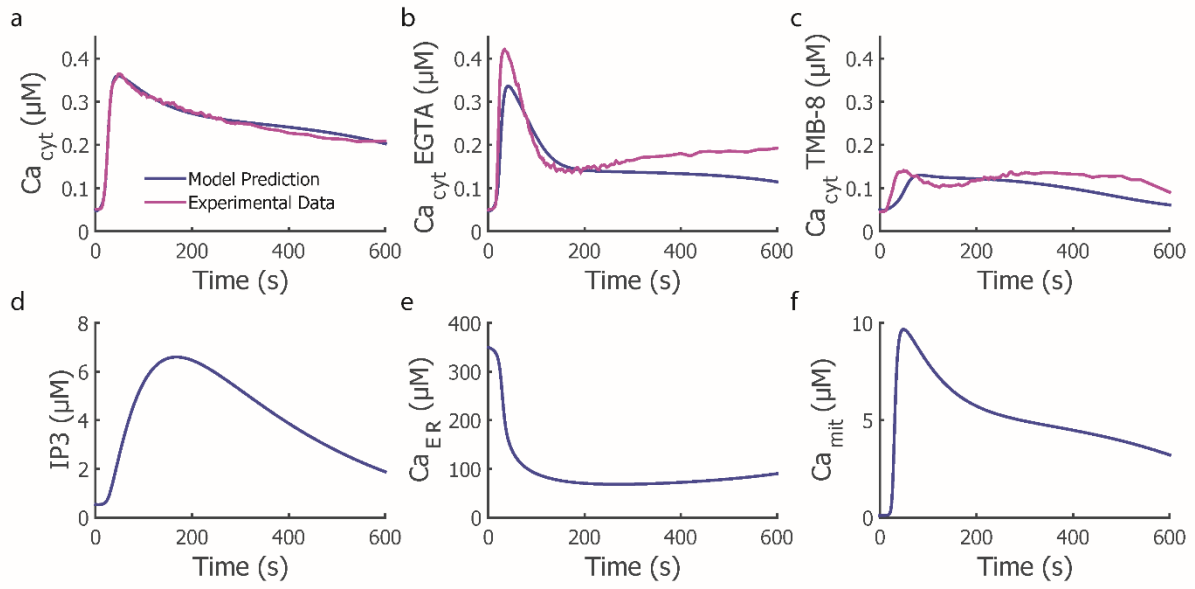

Supplement: pone.0159248.s003.pdf [file pone.0159248.s003.pdf]
