# Supplementary material for: Calcium Dynamics of Ex Vivo Long-Term Cultured CD8+ T Cells Are Regulated by Changes in Redox Metabolism
Source: PubMed Central journal article supplement (PMC4985122; doi:10.1371/journal.pone.0159248), 2016-08-15

**S5 Fig. Best fit of Old CD8<sup>+</sup> T Cell Model varying only two parameters,  $V_{crac}$  and  $V_{pmca}$ .**

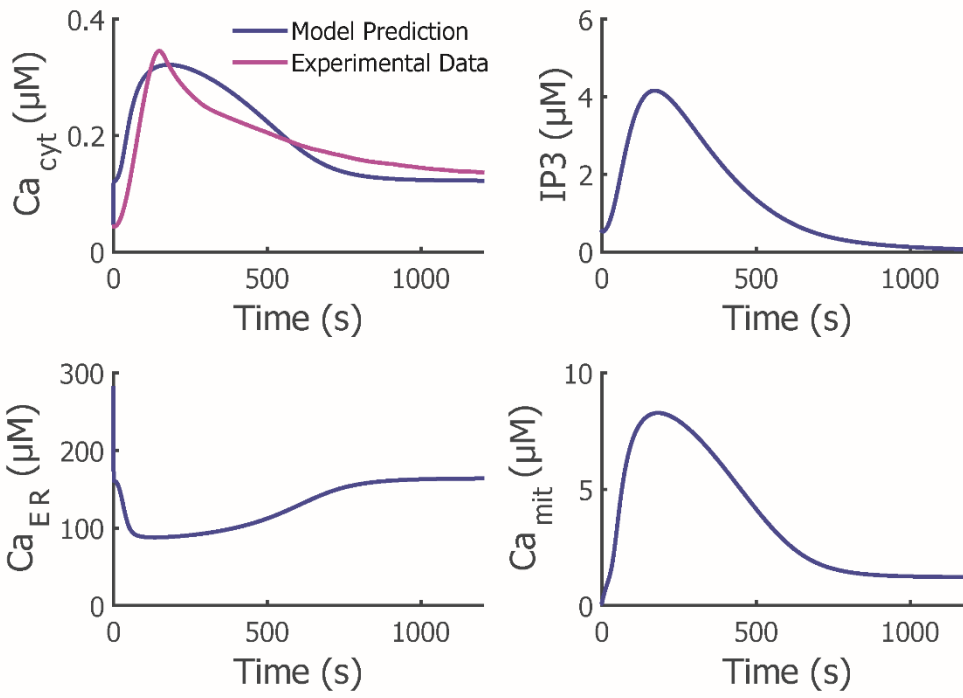

Supplement: pone.0159248.s005.pdf [file pone.0159248.s005.pdf]
