# Supplementary material for: Calcium Dynamics of Ex Vivo Long-Term Cultured CD8+ T Cells Are Regulated by Changes in Redox Metabolism
Source: PubMed Central journal article supplement (PMC4985122; doi:10.1371/journal.pone.0159248), 2016-08-15

**S7 Fig. Varying  $K_{stim}$  from the Young CD8<sup>+</sup> T Cell Model fit to investigate the effects on calcium traces.  $K_{stim}$  was varied +/- 20% the fit value of 178.**

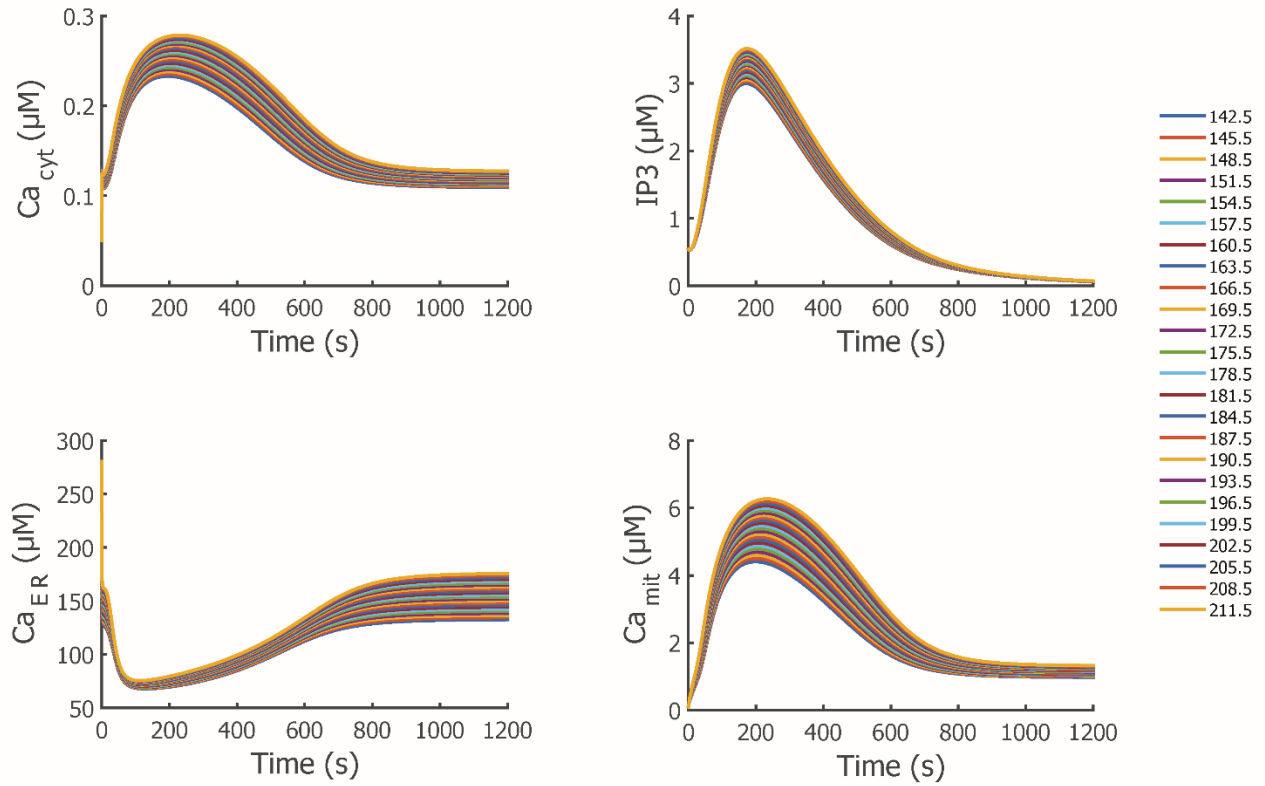

Supplement: pone.0159248.s007.pdf [file pone.0159248.s007.pdf]
