# Supplementary material for: Calcium Dynamics of Ex Vivo Long-Term Cultured CD8+ T Cells Are Regulated by Changes in Redox Metabolism
Source: PubMed Central journal article supplement (PMC4985122; doi:10.1371/journal.pone.0159248), 2016-08-15

**S9 Fig. Validation of RT-PCR results with Duox 1 expression.** a) Representative Western Blot. b) Quantification of the Western Blots. Protein levels are normalized to the young cells protein expression level. \*  $p < 0.05$  (paired 2-tail t-test).

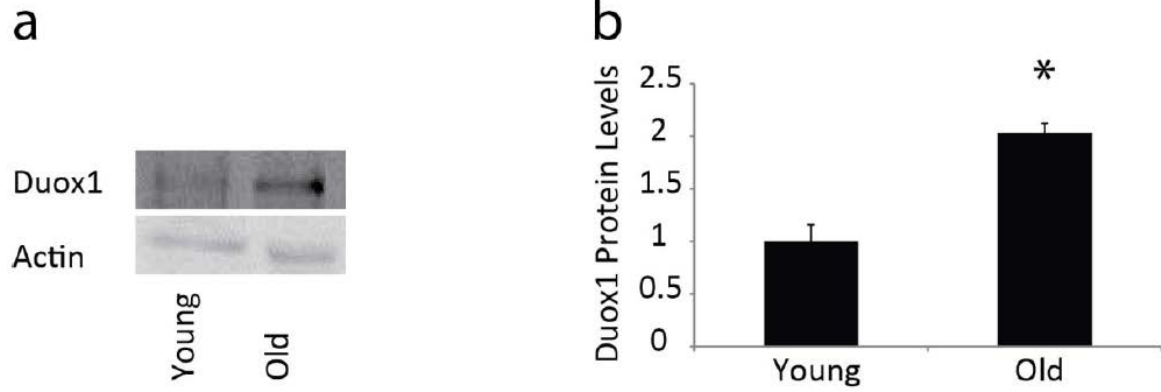

Supplement: pone.0159248.s009.pdf [file pone.0159248.s009.pdf]
