# Supplementary material for: Calcium Dynamics of Ex Vivo Long-Term Cultured CD8+ T Cells Are Regulated by Changes in Redox Metabolism
Source: PubMed Central journal article supplement (PMC4985122; doi:10.1371/journal.pone.0159248), 2016-08-15

**S10 Fig. Expression of STIM1 in young and old primary human CD8+ T cells.**

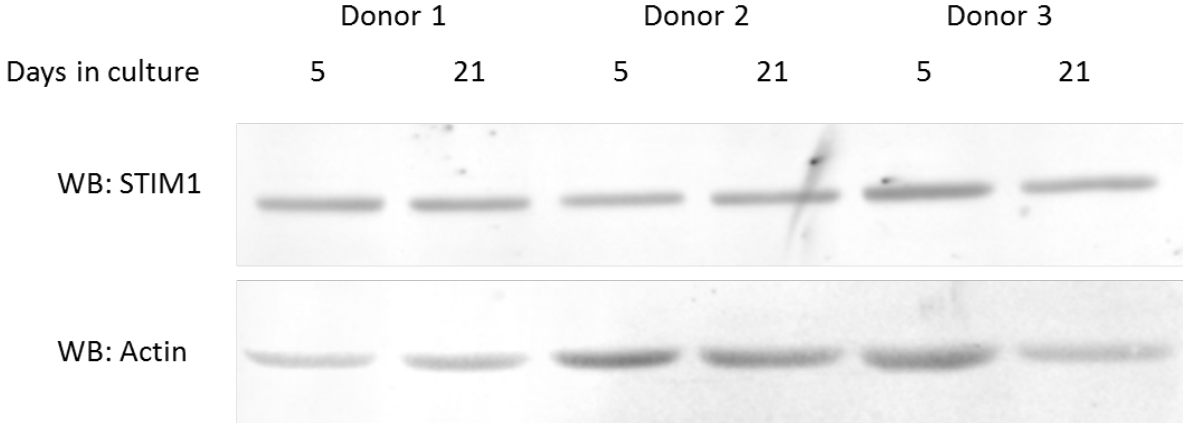

Supplement: pone.0159248.s010.pdf [file pone.0159248.s010.pdf]
