# Supplementary material for: Calcium Dynamics of Ex Vivo Long-Term Cultured CD8+ T Cells Are Regulated by Changes in Redox Metabolism
Source: PubMed Central journal article supplement (PMC4985122; doi:10.1371/journal.pone.0159248), 2016-08-15
Supplement: pone.0159248.s011.pdf [file pone.0159248.s011.pdf]

## Supplemental Information

**S1 Table. List of all oxidative stress and antioxidant PCR primer targets on the PCR array.**  
Red genes represent targets that are not expressed in CD8+ T cells.

|                |                                                 |               |                                                                |               |                                                                              |               |                                                                                       |
|----------------|-------------------------------------------------|---------------|----------------------------------------------------------------|---------------|------------------------------------------------------------------------------|---------------|---------------------------------------------------------------------------------------|
| <b>ALB</b>     | Albumin                                         | <b>GLRX2</b>  | Glutaredoxin 2                                                 | <b>MTL5</b>   | Metallothionein-like 5, testis-specific (tesmin)                             | <b>PTGS1</b>  | Prostaglandin-endoperoxide synthase 1 (prostaglandin G/H synthase and cyclooxygenase) |
| <b>ALOX12</b>  | Arachidonate 12-lipoxygenase                    | <b>GPR156</b> | G protein-coupled receptor 156                                 | <b>NCF1</b>   | Neutrophil cytosolic factor 1                                                | <b>PTGS2</b>  | Prostaglandin-endoperoxide synthase 2 (prostaglandin G/H synthase and cyclooxygenase) |
| <b>ANGPTL7</b> | Angiotensin-like 7                              | <b>GPX1</b>   | Glutathione peroxidase 1                                       | <b>NCF2</b>   | Neutrophil cytosolic factor 2                                                | <b>PXDN</b>   | Peroxidasin homolog (Drosophila)                                                      |
| <b>AOX1</b>    | Aldehyde oxidase 1                              | <b>GPX2</b>   | Glutathione peroxidase 2 (gastrointestinal)                    | <b>NME5</b>   | Non-metastatic cells 5, protein expressed in (nucleoside-diphosphate kinase) | <b>PXDNL</b>  | Peroxidasin homolog (Drosophila)-like                                                 |
| <b>APOE</b>    | Apolipoprotein E                                | <b>GPX3</b>   | Glutathione peroxidase 3 (plasma)                              | <b>NOS2</b>   | Nitric oxide synthase 2, inducible                                           | <b>RNF7</b>   | Ring finger protein 7                                                                 |
| <b>ATOX1</b>   | ATX1 antioxidant protein 1 homolog (yeast)      | <b>GPX4</b>   | Glutathione peroxidase 4 (phospholipid hydroperoxidase)        | <b>NOX5</b>   | NADPH oxidase, EF-hand calcium binding domain 5                              | <b>SCARA3</b> | Scavenger receptor class A, member 3                                                  |
| <b>BNIP3</b>   | BCL2/adenovirus E1B 19kDa interacting protein 3 | <b>GPX5</b>   | Glutathione peroxidase 5 (epididymal androgen-related protein) | <b>NUDT1</b>  | Nudix (nucleoside diphosphate linked moiety X)-type motif 1                  | <b>SELS</b>   | Selenoprotein S                                                                       |
| <b>CAT</b>     | Catalase                                        | <b>GPX6</b>   | Glutathione peroxidase 6 (olfactory)                           | <b>OXR1</b>   | Oxidation resistance 1                                                       | <b>SEPP1</b>  | Selenoprotein P, plasma, 1                                                            |
| <b>CCL5</b>    | Chemokine (C-C motif) ligand 5                  | <b>GPX7</b>   | Glutathione peroxidase 7                                       | <b>OXSR1</b>  | Oxidative-stress responsive 1                                                | <b>SFTPD</b>  | Surfactant protein D                                                                  |
| <b>CCS</b>     | Copper chaperone for superoxide dismutase       | <b>GSR</b>    | Glutathione reductase                                          | <b>PDLIM1</b> | PDZ and LIM domain 1                                                         | <b>SGK2</b>   | Serum/glucocorticoid regulated kinase 2                                               |
| <b>CSDE1</b>   | Cold shock domain containing E1, RNA-binding    | <b>GSS</b>    | Glutathione synthetase                                         | <b>IPCEF1</b> | Interaction protein for cytohesin exchange factors 1                         | <b>SIRT2</b>  | Sirtuin 2                                                                             |
| <b>CYBA</b>    | Cytochrome b-245, alpha                         | <b>GSTZ1</b>  | Glutathione transferase zeta 1                                 | <b>PNKP</b>   | Polynucleotide kinase 3'-phosphatase                                         | <b>SOD1</b>   | Superoxide dismutase 1, soluble                                                       |

|               |                                  |              |                                               |              |                                                                           |               |                                               |
|---------------|----------------------------------|--------------|-----------------------------------------------|--------------|---------------------------------------------------------------------------|---------------|-----------------------------------------------|
|               | polypeptide                      |              |                                               |              |                                                                           |               |                                               |
| <b>CYGB</b>   | Cytoglobin                       | <b>GTF2I</b> | General transcription factor III              | <b>PRDX1</b> | Peroxiredoxin 1                                                           | <b>SOD2</b>   | Superoxide dismutase 2, mitochondrial         |
| <b>DGKK</b>   | Diacylglycerol kinase, kappa     | <b>KRT1</b>  | Keratin 1                                     | <b>PRDX2</b> | Peroxiredoxin 2                                                           | <b>SOD3</b>   | Superoxide dismutase 3, extracellular         |
| <b>DHCR24</b> | 24-dehydrocholesterol reductase  | <b>LPO</b>   | Lactoperoxidase                               | <b>PRDX3</b> | Peroxiredoxin 3                                                           | <b>SRXN1</b>  | Sulfiredoxin 1                                |
| <b>DUOX1</b>  | Dual oxidase 1                   | <b>MBL2</b>  | Mannose-binding lectin (protein C) 2, soluble | <b>PRDX4</b> | Peroxiredoxin 4                                                           | <b>STK25</b>  | Serine/threonine kinase 25                    |
| <b>DUOX2</b>  | Dual oxidase 2                   | <b>MGST3</b> | Microsomal glutathione S-transferase 3        | <b>PRDX5</b> | Peroxiredoxin 5                                                           | <b>TPO</b>    | Thyroid peroxidase                            |
| <b>DUSP1</b>  | Dual specificity phosphatase 1   | <b>MPO</b>   | Myeloperoxidase                               | <b>PRDX6</b> | Peroxiredoxin 6                                                           | <b>TTN</b>    | Titin                                         |
| <b>EPHX2</b>  | Epoxide hydrolase 2, cytoplasmic | <b>MPV17</b> | MpV17 mitochondrial inner membrane protein    | <b>PREX1</b> | Phosphatidylinositol -3,4,5-trisphosphate-dependent Rac exchange factor 1 | <b>TXNDC2</b> | Thioredoxin domain containing 2 (spermatozoa) |
| <b>EPX</b>    | Eosinophil peroxidase            | <b>MSRA</b>  | Methionine sulfoxide reductase A              | <b>PRG3</b>  | Proteoglycan 3                                                            | <b>TXNRD1</b> | Thioredoxin reductase 1                       |
| <b>FOXM1</b>  | Forkhead box M1                  | <b>MT3</b>   | Metallothionein 3                             | <b>PRNP</b>  | Prion protein                                                             | <b>TXNRD2</b> | Thioredoxin reductase 2                       |
