# Supplementary material for: Calcium Dynamics of Ex Vivo Long-Term Cultured CD8+ T Cells Are Regulated by Changes in Redox Metabolism
Source: PubMed Central journal article supplement (PMC4985122; doi:10.1371/journal.pone.0159248), 2016-08-15
Supplement: pone.0159248.s012.pdf [file pone.0159248.s012.pdf]

**S2 Table. Exhaustive list of fold changes and their corresponding p-values in targets expressed in CD8+ T cells. A fold change below 1 corresponds to a downregulation ( $2^{-\Delta\text{CT}}$ ).**

| Symbol         | Protein Name                                                             | Fold Change Old/Young | p-value |
|----------------|--------------------------------------------------------------------------|-----------------------|---------|
| <b>PDLIM1</b>  | PDZ and LIM domain 1                                                     | 0.17                  | 0.01    |
| <b>ANGPTL7</b> | Angiopoietin-like 7                                                      | 2.93                  | 0.01    |
| <b>MTL5</b>    | Metallothionein-like 5, testis-specific (tesmin)                         | 0.45                  | 0.01    |
| <b>NUDT1</b>   | Nudix (nucleoside diphosphate linked moiety X)-type motif 1              | 0.99                  | 0.01    |
| <b>TTN</b>     | Titin                                                                    | 2.14                  | 0.01    |
| <b>DUOX1</b>   | Dual oxidase 1                                                           | 1.68                  | 0.03    |
| <b>GPX3</b>    | Glutathione peroxidase 3 (plasma)                                        | 2.55                  | 0.04    |
| <b>GLRX2</b>   | Glutaredoxin 2                                                           | 0.47                  | 0.06    |
| <b>PRNP</b>    | Prion protein                                                            | 1.45                  | 0.07    |
| <b>TXNRD1</b>  | Thioredoxin reductase 1                                                  | 0.31                  | 0.08    |
| <b>PRDX1</b>   | Peroxiredoxin 1                                                          | 0.74                  | 0.13    |
| <b>CCL5</b>    | Chemokine (C-C motif) ligand 5                                           | 3.81                  | 0.15    |
| <b>TXNRD2</b>  | Thioredoxin reductase 2                                                  | 1.15                  | 0.18    |
| <b>GPX2</b>    | Glutathione peroxidase 2 (gastrointestinal)                              | 2.15                  | 0.20    |
| <b>SEPP1</b>   | Selenoprotein P, plasma, 1                                               | 0.34                  | 0.21    |
| <b>ATOX1</b>   | ATX1 antioxidant protein 1 homolog (yeast)                               | 0.50                  | 0.22    |
| <b>BNIP3</b>   | BCL2/adenovirus E1B 19kDa interacting protein 3                          | 1.12                  | 0.23    |
| <b>CCS</b>     | Copper chaperone for superoxide dismutase                                | 0.22                  | 0.23    |
| <b>PX1</b>     | Glutathione peroxidase 1                                                 | 0.18                  | 0.23    |
| <b>PREX1</b>   | Phosphatidylinositol-3,4,5-trisphosphate-dependent Rac exchange factor 1 | 0.90                  | 0.24    |
| <b>PRDX5</b>   | Peroxiredoxin 5                                                          | 0.80                  | 0.29    |
| <b>CSDE1</b>   | Cold shock domain containing E1, RNA-binding                             | 0.49                  | 0.30    |
| <b>SIRT2</b>   | Sirtuin 2                                                                | 1.25                  | 0.32    |
| <b>FOXM1</b>   | Forkhead box M1                                                          | 1.78                  | 0.33    |
| <b>GTF2I</b>   | General transcription factor Iii                                         | 0.52                  | 0.34    |
| <b>GSS</b>     | Glutathione synthetase                                                   | 0.26                  | 0.37    |
| <b>NCF1</b>    | Neutrophil cytosolic factor 1                                            | 9.32                  | 0.42    |
| <b>ALOX12</b>  | Arachidonate 12-lipoxygenase                                             | 0.60                  | 0.46    |
| <b>STK25</b>   | Serine/threonine kinase 25                                               | 4.65                  | 0.46    |
| <b>GPX4</b>    | Glutathione peroxidase 4 (phospholipid hydroperoxidase)                  | 0.02                  | 0.47    |
| <b>SELS</b>    | Selenoprotein S                                                          | 0.10                  | 0.48    |
| <b>MPV17</b>   | MpV17 mitochondrial inner membrane protein                               | 0.57                  | 0.49    |
| <b>MGST3</b>   | Microsomal glutathione S-transferase 3                                   | 0.49                  | 0.50    |
| <b>GSR</b>     | Glutathione reductase                                                    | 0.73                  | 0.51    |
| <b>PRDX2</b>   | Peroxiredoxin 2                                                          | 0.75                  | 0.51    |
| <b>SOD1</b>    | Superoxide dismutase 1, soluble                                          | 6.52                  | 0.51    |
| <b>SRXN1</b>   | Sulfiredoxin 1                                                           | 0.12                  | 0.52    |
| <b>CAT</b>     | Catalase                                                                 | 122.49                | 0.56    |
| <b>MSRA</b>    | Methionine sulfoxide reductase A                                         | 0.79                  | 0.57    |
| <b>MT3</b>     | Metallothionein 3                                                        | 0.28                  | 0.59    |
| <b>NCF2</b>    | Neutrophil cytosolic factor 2                                            | 1.49                  | 0.59    |

|               |                                                      |      |      |
|---------------|------------------------------------------------------|------|------|
| <b>OXR1</b>   | Oxidation resistance 1                               | 0.02 | 0.59 |
| <b>GPX7</b>   | Glutathione peroxidase 7                             | 0.17 | 0.60 |
| <b>EPX</b>    | Eosinophil peroxidase                                | 0.83 | 0.64 |
| <b>CYBA</b>   | P22-phox                                             | 0.41 | 0.65 |
| <b>GSTZ1</b>  | Glutathione transferase zeta 1                       | 1.89 | 0.65 |
| <b>PRDX6</b>  | Peroxiredoxin 6                                      | 3.93 | 0.65 |
| <b>IPCEF1</b> | Interaction protein for cytohesin exchange factors 1 | 0.65 | 0.66 |
| <b>PRDX4</b>  | Peroxiredoxin 4                                      | 2.87 | 0.70 |
| <b>SOD2</b>   | Superoxide dismutase 2, mitochondrial                | 0.33 | 0.70 |
| <b>DUSP1</b>  | Dual specificity phosphatase 1                       | 4.56 | 0.71 |
| <b>RNF7</b>   | Ring finger protein 7                                | 6.55 | 0.71 |
| <b>SFTPD</b>  | Surfactant protein D                                 | 3.35 | 0.72 |
| <b>DHCR24</b> | 24-dehydrocholesterol reductase                      | 0.57 | 0.82 |
| <b>PRDX3</b>  | Peroxiredoxin 3                                      | 1.60 | 0.84 |
| <b>OXSR1</b>  | Oxidation resistance 1                               | 2.20 | 0.95 |
| <b>PNKP</b>   | Polynucleotide kinase 3'-phosphatase                 | 1.59 | 0.98 |
