# Supplementary material for: Calcium Dynamics of Ex Vivo Long-Term Cultured CD8+ T Cells Are Regulated by Changes in Redox Metabolism
Source: PubMed Central journal article supplement (PMC4985122; doi:10.1371/journal.pone.0159248), 2016-08-15
Supplement: pone.0159248.s013.pdf [file pone.0159248.s013.pdf]

**S3 Table S3. Normalized mRNA levels of individual genes expressed in young CD8+ T cells, ranked in descending order of expression (n=6).**

| <b>Symbol</b> | <b>Protein Name</b>                                                      | <b>Mean <math>\Delta</math>Ct <math>\pm</math> SEM</b> | <b>% CV</b> |
|---------------|--------------------------------------------------------------------------|--------------------------------------------------------|-------------|
| <b>CYBA</b>   | P22-phox                                                                 | 3.77 $\pm$ 0.4                                         | 10.64       |
| <b>CCL5</b>   | Chemokine (C-C motif) ligand 5                                           | 3.58 $\pm$ 0.68                                        | 19.06       |
| <b>SOD1</b>   | Superoxide dismutase 1, soluble                                          | 4.19 $\pm$ 0.23                                        | 5.56        |
| <b>GPX4</b>   | Glutathione peroxidase 4<br>(phospholipid hydroperoxidase)               | 4.38 $\pm$ 0.40                                        | 9.24        |
| <b>PRDX6</b>  | Peroxiredoxin 6                                                          | 4.60 $\pm$ 0.30                                        | 6.48        |
| <b>GTF2I</b>  | General transcription factor Iii                                         | 4.79 $\pm$ 0.28                                        | 5.93        |
| <b>PRDX3</b>  | Peroxiredoxin 3                                                          | 4.61 $\pm$ 0.46                                        | 9.98        |
| <b>PRDX2</b>  | Peroxiredoxin 2                                                          | 4.78 $\pm$ 0.35                                        | 7.24        |
| <b>GPX1</b>   | Glutathione peroxidase 1                                                 | 5.17 $\pm$ 0.23                                        | 4.48        |
| <b>CSDE1</b>  | Cold shock domain containing E1, RNA-binding                             | 5.19 $\pm$ 0.23                                        | 4.48        |
| <b>FOXM1</b>  | Forkhead box M1                                                          | 5.39 $\pm$ 0.18                                        | 3.44        |
| <b>PRDX5</b>  | Peroxiredoxin 5                                                          | 5.38 $\pm$ 0.28                                        | 5.25        |
| <b>ATOX1</b>  | ATX1 antioxidant protein 1 homolog (yeast)                               | 5.60 $\pm$ 0.21                                        | 3.70        |
| <b>TXNRD1</b> | Thioredoxin reductase 1                                                  | 6.17 $\pm$ 0.08                                        | 1.33        |
| <b>DHCR24</b> | 24-dehydrocholesterol reductase                                          | 6.38 $\pm$ 0.18                                        | 2.83        |
| <b>RNF7</b>   | Ring finger protein 7                                                    | 6.58 $\pm$ 0.21                                        | 3.13        |
| <b>SOD2</b>   | Superoxide dismutase 2, mitochondrial                                    | 6.59 $\pm$ 0.21                                        | 3.12        |
| <b>OXSRI</b>  | Oxidative-stress responsive 1                                            | 6.98 $\pm$ 0.10                                        | 1.47        |
| <b>CAT</b>    | Catalase                                                                 | 6.78 $\pm$ 0.4                                         | 5.92        |
| <b>PRDX4</b>  | Peroxiredoxin 4                                                          | 6.99 $\pm$ 0.36                                        | 5.18        |
| <b>MGST3</b>  | Microsomal glutathione S-transferase 3                                   | 7.18 $\pm$ 0.23                                        | 3.22        |
| <b>MPV17</b>  | MpV17 mitochondrial inner membrane protein                               | 7.18 $\pm$ 0.23                                        | 3.21        |
| <b>GLRX2</b>  | Glutaredoxin 2                                                           | 7.39 $\pm$ 0.18                                        | 2.49        |
| <b>GSS</b>    | Glutathione synthetase                                                   | 7.37 $\pm$ 0.28                                        | 3.81        |
| <b>BNIP3</b>  | BCL2/adenovirus E1B 19kDa interacting protein 3                          | 7.38 $\pm$ 0.34                                        | 4.62        |
| <b>SELS</b>   | Selenoprotein S                                                          | 7.78 $\pm$ 0.28                                        | 3.62        |
| <b>STK25</b>  | Serine/threonine kinase 25                                               | 7.98 $\pm$ 0.10                                        | 1.24        |
| <b>TXNRD2</b> | Thioredoxin reductase 2                                                  | 7.79 $\pm$ 0.34                                        | 4.43        |
| <b>NUDT1</b>  | Nudix (nucleoside diphosphate linked moiety X)-type motif 1              | 8.18 $\pm$ 0.09                                        | 1.04        |
| <b>PNKP</b>   | Polynucleotide kinase 3'-phosphatase                                     | 7.99 $\pm$ 0.31                                        | 3.89        |
| <b>GPX7</b>   | Glutathione peroxidase 7                                                 | 8.00 $\pm$ 0.31                                        | 3.89        |
| <b>OXR1</b>   | Oxidation resistance 1                                                   | 8.19 $\pm$ 0.23                                        | 2.85        |
| <b>PRDX1</b>  | Peroxiredoxin 1                                                          | 8.19 $\pm$ 0.30                                        | 3.70        |
| <b>CCS</b>    | Copper chaperone for superoxide dismutase                                | 8.80 $\pm$ 0.19                                        | 2.13        |
| <b>IPCEF1</b> | Interaction protein for cytohesin exchange factors 1                     | 8.57 $\pm$ 0.58                                        | 6.78        |
| <b>MTL5</b>   | Metallothionein-like 5, testis-specific (tesmin)                         | 8.97 $\pm$ 0.31                                        | 3.46        |
| <b>SIRT2</b>  | Sirtuin 2                                                                | 9.01 $\pm$ 0.38                                        | 4.20        |
| <b>PREX1</b>  | Phosphatidylinositol-3,4,5-trisphosphate-dependent Rac exchange factor 1 | 9.18 $\pm$ 0.23                                        | 2.49        |
| <b>GSTZ1</b>  | Glutathione transferase zeta 1                                           | 9.19 $\pm$ 0.37                                        | 4.07        |
| <b>NCF2</b>   | Neutrophil cytosolic factor 2                                            | 9.38 $\pm$ 0.39                                        | 4.20        |
| <b>NCF1</b>   | Neutrophil cytosolic factor 1                                            | 9.00 $\pm$ 0.89                                        | 9.91        |

|                |                                             |              |      |
|----------------|---------------------------------------------|--------------|------|
| <b>SRXN1</b>   | Sulfiredoxin 1                              | 10.18 ± 0.23 | 2.26 |
| <b>MSRA</b>    | Methionine sulfoxide reductase A            | 10.18 ± 0.3  | 2.93 |
| <b>DUSP1</b>   | Dual specificity phosphatase 1              | 10.19 ± 0.43 | 4.19 |
| <b>GPX3</b>    | Glutathione peroxidase 3 (plasma)           | 10.37 ± 0.49 | 4.76 |
| <b>SEPP1</b>   | Selenoprotein P, plasma, 1                  | 10.57 ± 0.29 | 2.80 |
| <b>PRNP</b>    | Prion protein                               | 11.01 ± 0.10 | 0.90 |
| <b>GSR</b>     | Glutathione reductase                       | 10.78 ± 0.34 | 3.17 |
| <b>PDLIM1</b>  | PDZ and LIM domain 1                        | 10.98 ± 0.3  | 2.79 |
| <b>TTN</b>     | Titin                                       | 11.19 ± 0.42 | 3.79 |
| <b>MT3</b>     | Metallothionein 3                           | 11.4 ± 0.73  | 6.40 |
| <b>ANGPTL7</b> | Angiopoietin-like 7                         | 12.17 ± 0.23 | 1.87 |
| <b>ALOX12</b>  | Arachidonate 12-lipoxygenase                | 12.17 ± 0.42 | 3.48 |
| <b>EPX</b>     | Eosinophil peroxidase                       | 12.58 ± 0.41 | 3.29 |
| <b>DUOX1</b>   | Dual oxidase 1                              | 12.78 ± 0.34 | 2.68 |
| <b>SFTPD</b>   | Surfactant protein D                        | 12.57 ± 0.76 | 6.07 |
| <b>PXDN</b>    | Peroxidasin homolog (Drosophila)            | 13.21 ± 0.62 | 4.70 |
| <b>GPX2</b>    | Glutathione peroxidase 2 (gastrointestinal) | 13.99 ± 0.47 | 3.36 |
