# Supplementary material for: Calcium Dynamics of Ex Vivo Long-Term Cultured CD8+ T Cells Are Regulated by Changes in Redox Metabolism
Source: PubMed Central journal article supplement (PMC4985122; doi:10.1371/journal.pone.0159248), 2016-08-15
Supplement: pone.0159248.s014.pdf [file pone.0159248.s014.pdf]

**S4 Table. Optimized parameter set obtained from the Jurkat T Cell Model fitting used for the seeding the initial population of parameter values for the genetic algorithm optimization of the Young CD8<sup>+</sup> T Cell Model to experimental data.**

| <b>Parameter</b> | <b>Jurkat T cells</b>                 |
|------------------|---------------------------------------|
| $\beta_i^*$      | 0.056                                 |
| $\beta_{er}^*$   | 0.049                                 |
| $\beta_{mit}$    | 0.033                                 |
| $\rho_{er}$      | 0.015                                 |
| $\rho_{mit}$     | 0.08                                  |
| $k_{PLCact}$     | 0.0033 s <sup>-1</sup>                |
| $k_{PLCdeact}$   | 0.042 s <sup>-1</sup>                 |
| $k_{IP3prod}$    | 0.48 μM <sup>-1</sup> s <sup>-1</sup> |
| $k_{IP3deg}^*$   | 0.010 s <sup>-1</sup>                 |
| $V_{IP3}$        | 4.0 s <sup>-1</sup>                   |
| $K_{IP3}$        | 0.57 μM                               |
| $K_{act}$        | 0.13 μM                               |
| $A$              | 0.079                                 |
| $K_{inh}$        | 1 μM                                  |
| $K_{IP3inh}^*$   | 0.82 μM                               |
| $K_{ERleak}^*$   | 0.0043 s <sup>-1</sup>                |
| $V_{serca}^*$    | 112.75 μM s <sup>-1</sup>             |
| $K_{serca}$      | 0.43 μM                               |
| $V_{mitin}$      | 388.6 μM s <sup>-1</sup>              |
| $K_{mitin}$      | 0.81 μM                               |
| $V_{mitout}^*$   | 188.9 μM s <sup>-1</sup>              |
| $K_{mitout}^*$   | 4.03 μM                               |
| $V_{crac}$       | 2.4 μM s <sup>-1</sup>                |
| $K_{soc}^*$      | 363.5 μM                              |
| $K_{stim}$       | 178.1 μM                              |

---

|              |                                    |
|--------------|------------------------------------|
| $K_{PMleak}$ | $1.1e-6 \text{ s}^{-1}$            |
| $V_{pmca}^*$ | $2.14 \text{ } \mu\text{M s}^{-1}$ |
| $K_{pmca}$   | $0.11 \text{ } \mu\text{M}$        |

---
