# Supplementary material for: Calcium Dynamics of Ex Vivo Long-Term Cultured CD8+ T Cells Are Regulated by Changes in Redox Metabolism
Source: PubMed Central journal article supplement (PMC4985122; doi:10.1371/journal.pone.0159248), 2016-08-15
Supplement: pone.0159248.s015.pdf [file pone.0159248.s015.pdf]

**S5 Table. Optimized parameter set obtained from fitting the Young CD8<sup>+</sup> T Cell Model to experimental data.** This parameter set was used for all sensitivity analysis performed on the Young CD8<sup>+</sup> T Cell Model.

| Parameter      | Primary CD8 <sup>+</sup> T cells      |
|----------------|---------------------------------------|
| $\beta_i^*$    | 0.047                                 |
| $\beta_{er}^*$ | 0.98                                  |
| $\beta_{mit}$  | 0.033                                 |
| $\rho_{er}$    | 0.015                                 |
| $\rho_{mit}$   | 0.08                                  |
| $k_{PLCact}$   | 0.0033 s <sup>-1</sup>                |
| $k_{PLCdeact}$ | 0.042 s <sup>-1</sup>                 |
| $k_{IP3prod}$  | 0.48 μM <sup>-1</sup> s <sup>-1</sup> |
| $k_{IP3deg}^*$ | 0.018 μs <sup>-1</sup>                |
| $V_{IP3}$      | 4.0 μs <sup>-1</sup>                  |
| $K_{IP3}$      | 0.57 μM                               |
| $K_{act}$      | 0.13 μM                               |
| $A$            | 0.079                                 |
| $K_{inh}$      | 1 μM                                  |
| $K_{IP3inh}^*$ | 1.5 μM                                |
| $K_{ERleak}^*$ | 0.048 s <sup>-1</sup>                 |
| $V_{serca}^*$  | 103.88 μM s <sup>-1</sup>             |
| $K_{serca}$    | 0.43 μM                               |
| $V_{mitin}$    | 388.6 μM s <sup>-1</sup>              |
| $K_{mitin}$    | 0.81 μM                               |
| $V_{mitout}^*$ | 244.7 μM s <sup>-1</sup>              |
| $K_{mitout}^*$ | 4.7 μM                                |
| $V_{crac}$     | 2.4 μM s <sup>-1</sup>                |

---

|              |                           |
|--------------|---------------------------|
| $K_{soc}^*$  | 358.8 $\mu\text{M}$       |
| $K_{stim}$   | 178.1 $\mu\text{M}$       |
| $K_{PMleak}$ | 1.1e-6 $\text{s}^{-1}$    |
| $V_{pmca}^*$ | 2.08 $\mu\text{M s}^{-1}$ |
| $K_{pmca}$   | 0.11 $\mu\text{M}$        |

---
